# Supplementary material for: Interaction of flavonoid topoisomerase I and II inhibitors with DNA oligomers
Source: Royal Society of Chemistry journal article supplement (doi:10.1039/b517245b), 2006-01-01

## Supplementary Information

**Fig. 1S** DECRA plot of fitting the DPGSE experiment for the genistein, **1** (top), interaction with d(GCGATCGC)<sub>2</sub> octamer duplex (bottom). The two components are displayed separately.

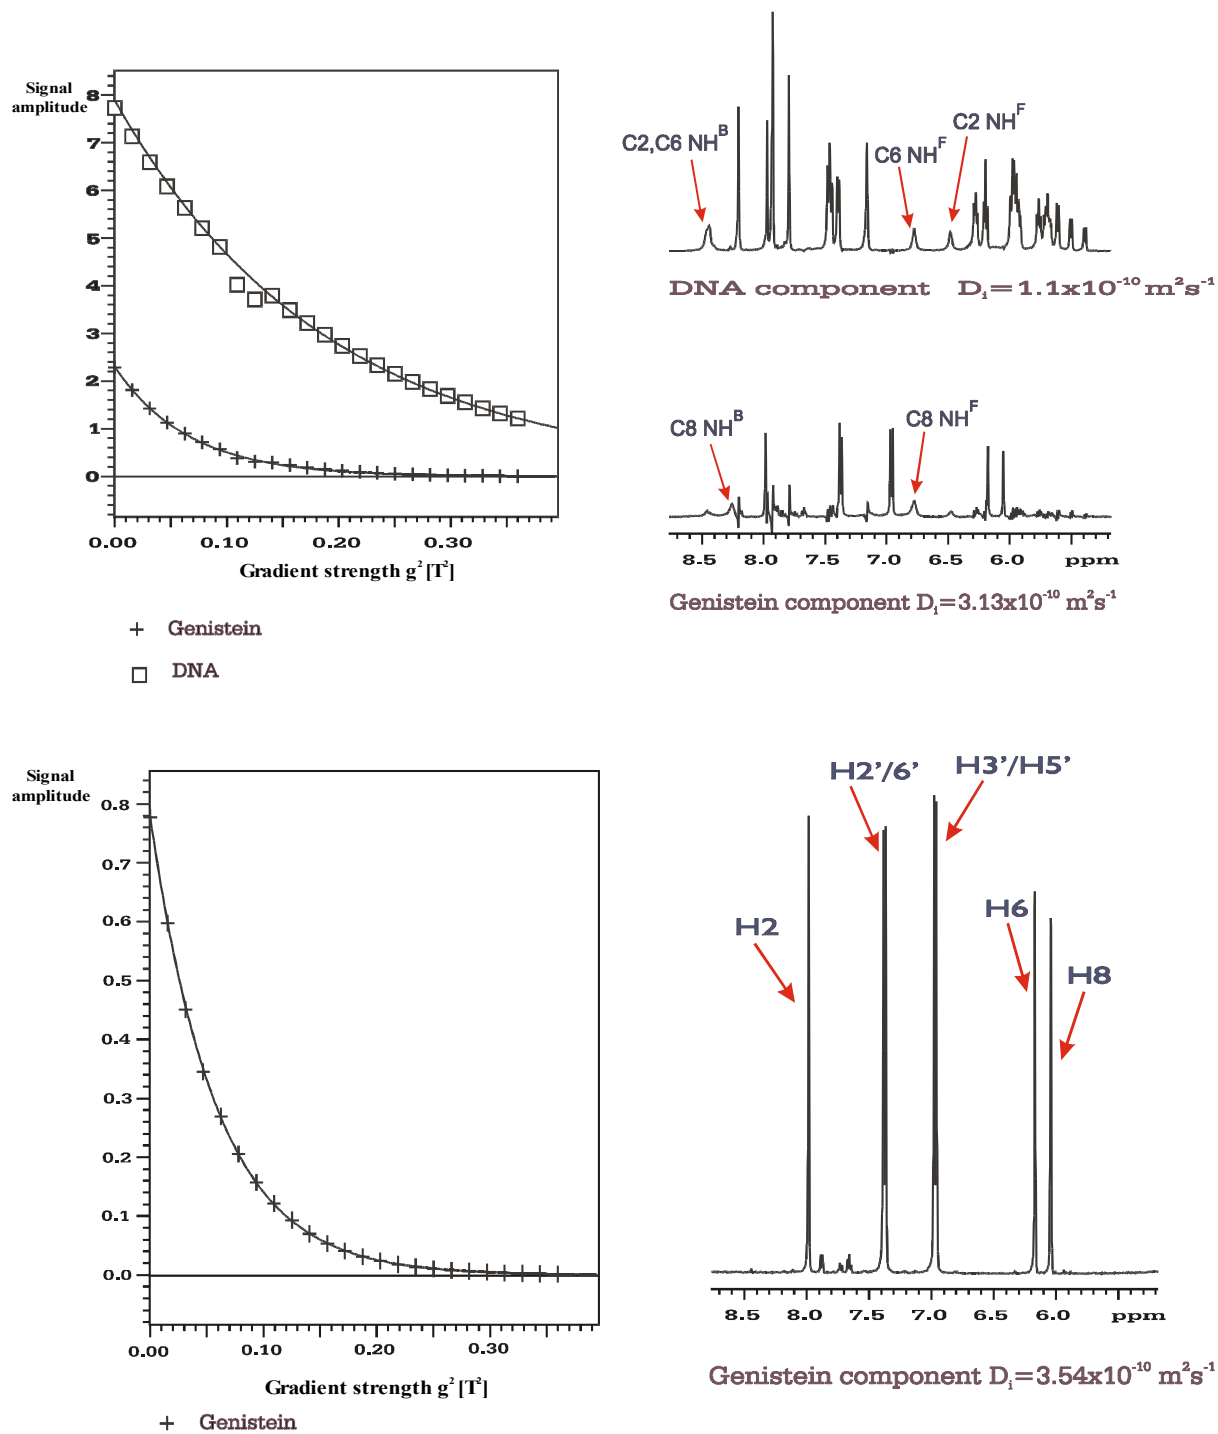

**Table 1S** DNMR results performed on d(GCGTACGC)<sub>2</sub> duplex DNA oligomer. Chemical shift are referenced vs. TSPA signal.

|             | <b>G1/H8</b> | <b>G1/H1'</b> | <b>C2/H6</b> | <b>C2/H1'</b> | <b>C2/H5</b> | <b>G3/H8</b> | <b>G3/H1'</b> | <b>T4/H6</b> | <b>T4/H1'</b> |
|-------------|--------------|---------------|--------------|---------------|--------------|--------------|---------------|--------------|---------------|
| <b>5°C</b>  | 7,994        | 6,010         | 7,426        | 5,773         | 5,373        | 7,977        | 6,010         | 7,269        | 5,650         |
| <b>10°C</b> | 7,995        | 6,013         | 7,445        | 5,775         | 5,387        | 7,969        | 6,013         | 7,260        | 5,660         |
| <b>20°C</b> | 7,990        | 6,017         | 7,448        | 5,785         | 5,407        | 7,952        | 6,017         | 7,247        | 5,677         |
| <b>30°C</b> | 7,979        | 6,017         | 7,446        | 5,791         | 5,421        | 7,936        | 6,017         | 7,233        | 5,689         |

|             | <b>A5/H8</b> | <b>A5/H1'</b> | <b>A5/H2</b> | <b>C6/H6</b> | <b>C6/H1'</b> | <b>C6/H5</b> | <b>G7/H8</b> | <b>G7/H1'</b> | <b>C8/H6</b> | <b>C8/H1'</b> | <b>C8/H5</b> |
|-------------|--------------|---------------|--------------|--------------|---------------|--------------|--------------|---------------|--------------|---------------|--------------|
| <b>5°C</b>  | 8,331        | 6,172         | 7,469        | 7,294        | 5,598         | 5,304        | 7,886        | 5,948         | 7,441        | 6,213         | 5,373        |
| <b>10°C</b> | 8,327        | 6,183         | 7,477        | 7,290        | 5,604         | 5,310        | 7,888        | 5,952         | 7,445        | 6,213         | 5,387        |
| <b>20°C</b> | 8,316        | 6,199         | 7,494        | 7,283        | 5,614         | 5,316        | 7,886        | 5,955         | 7,462        | 6,213         | 5,466        |
| <b>30°C</b> | 8,305        | 6,208         | 7,506        | 7,272        | 5,621         | 5,320        | 7,880        | 5,959         | 7,474        | 6,213         | 5,503        |

**Fig. 2S** Temperature dependence of chemical shifts of signals which appeared between a) 5.2 ~ 6.3 ppm, b) 7.0 ~ 8.4 ppm

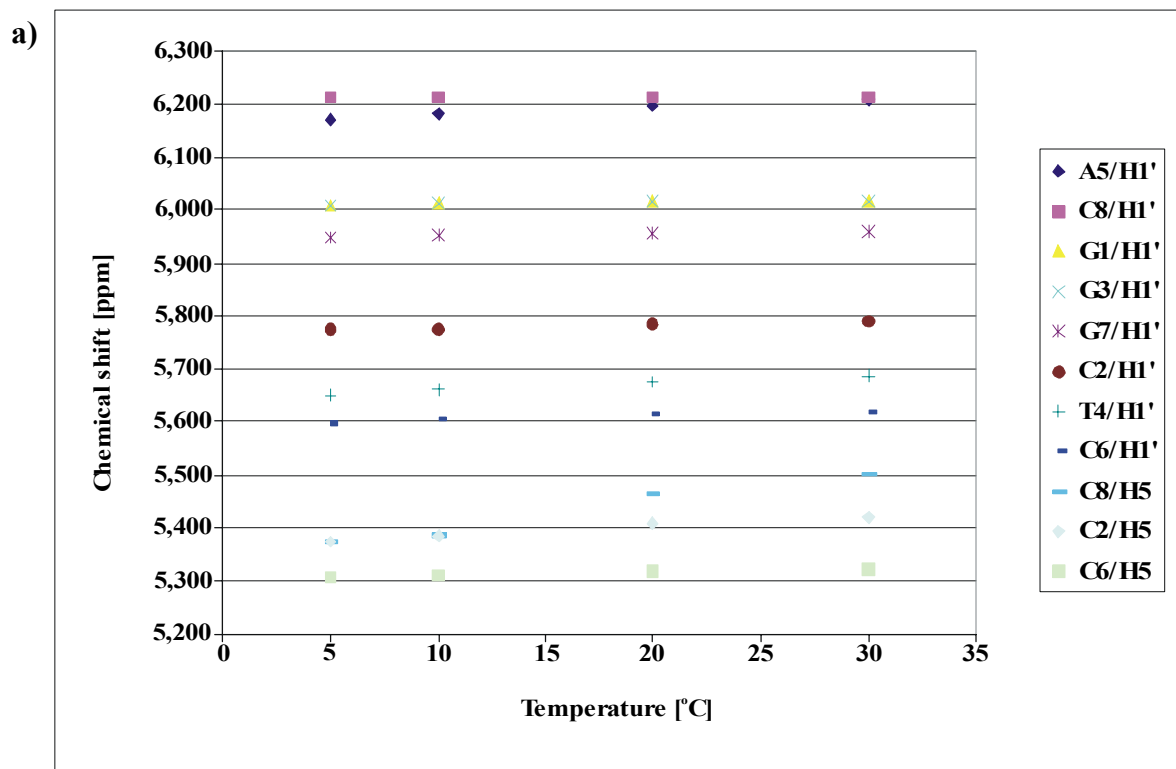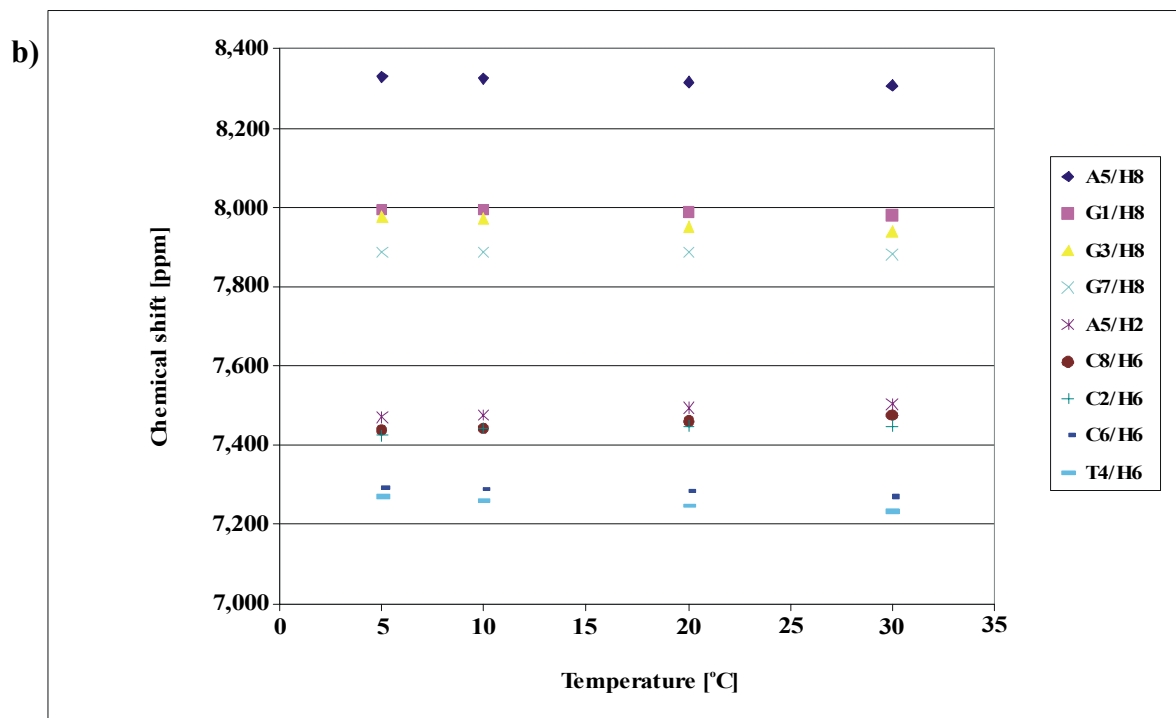

**Fig. 3S** Dilution curves for the d(GCGTACGC)<sub>2</sub> duplex with DMSO-*d*<sub>6</sub>

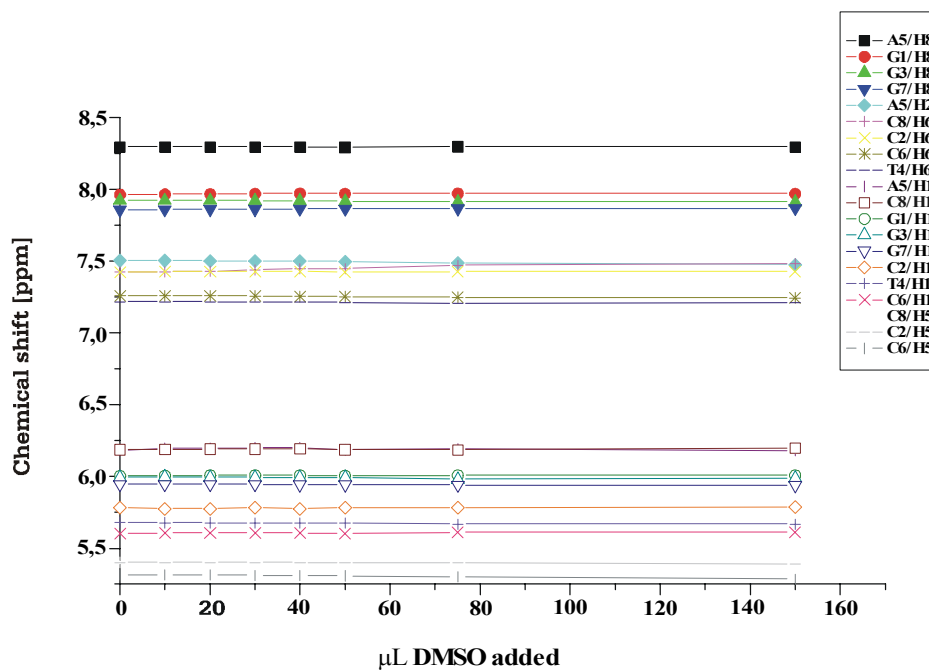

Supplement: b517245b.pdf [file b517245b.pdf]
